# Supplementary material
Source: PubMed Central journal article supplement (PMC3563401)
Supplement: 97320630009072S1.pdf [file 97320630009072S1.pdf]

## Supplementary material:

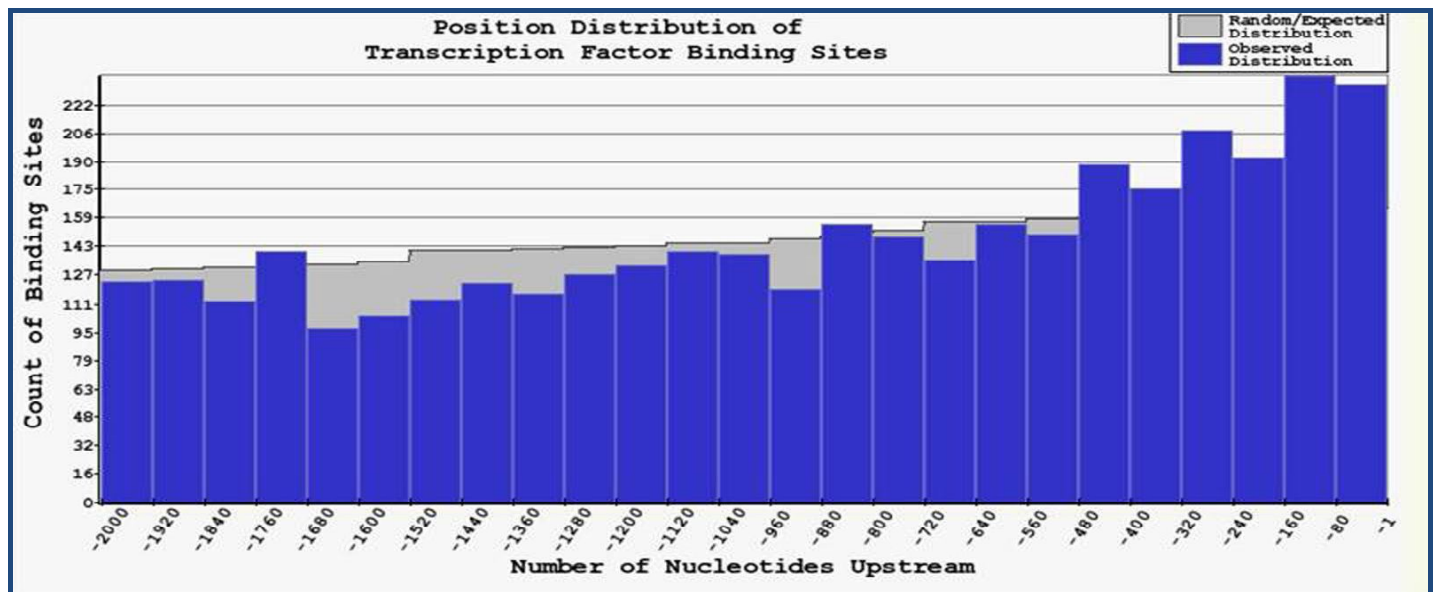

**Supplementary Figure 1:** Position distribution of transcription factor binding sites on the 2000bp upstream in promoter sequences of coordinated upregulated genes across tissues and developmental stages under drought in rice.

**Table 1:** Gene Ontology (biological process) enrichment analysis for differentially expressed genes in all tissues under drought stress.

| GO_ID      | Description                      | Number of genes | p-value  |
|------------|----------------------------------|-----------------|----------|
| GO:0006950 | response to stress               | 10              | 0.00535  |
| GO:0050896 | response to stimulus             | 10              | 0.0791   |
| GO:0009415 | response to water stimulus       | 5               | 1.41E-07 |
| GO:0009628 | response to abiotic stimulus     | 5               | 0.000632 |
| GO:0010035 | response to inorganic substance  | 5               | 0.000109 |
| GO:0042221 | response to chemical stimulus    | 5               | 0.0298   |
| GO:0006470 | protein dephosphorylation        | 5               | 0.000223 |
| GO:0016311 | dephosphorylation                | 5               | 0.00029  |
| GO:0006108 | malate metabolic process         | 2               | 0.0718   |
| GO:0009790 | embryo development               | 3               | 2.71E-05 |
| GO:0048856 | anatomical structure development | 3               | 0.0402   |

**Table 2:** Enriched conserved *cis*-regulatory elements within 2kb upstream sequences of coordinated upregulated genes across tissues and developmental stages under drought in rice.

| TFBS              | Promoters | Predicted TFBS | Description                                                                                                                                                                   | P value           |
|-------------------|-----------|----------------|-------------------------------------------------------------------------------------------------------------------------------------------------------------------------------|-------------------|
| ABADES11          | 5         | 5              | Responsive to ABA and desiccation                                                                                                                                             | 10 <sup>-3</sup>  |
| ABRE OsRAB21      | 31        | 41             | ABA responsive element (ABRE)" of wheat Em and rice (O.s.) rab21 genes                                                                                                        | 10 <sup>-6</sup>  |
| ABRE ZmRAB28      | 11        | 28             | ABA and water-stress responses; Found in maize                                                                                                                                | 10 <sup>-3</sup>  |
| ACGT ABRE         | 55        | 130            | Experimentally determined sequence requirement of ACGT-core of motif                                                                                                          | 10 <sup>-10</sup> |
| MOTIF A2OSEM      |           |                | A in ABRE of the rice gene                                                                                                                                                    |                   |
| ACGT OsGLUB1      | 28        | 40             | ACGT motif" found in GluB-1 gene in rice (O.s.)                                                                                                                               | 10 <sup>-8</sup>  |
| BP5 OsWX          | 18        | 18             | OsBP-5 (a MYC protein) binding site in Wx promoter                                                                                                                            | 10 <sup>-4</sup>  |
| CE3 OsOSEM        | 2         | 2              | CE3 (Coupling Element 3)" found in the promoter of the rice (O.s.) Osem gene; Required for ABA-responsiveness and VP1 activation                                              | 10 <sup>-3</sup>  |
| CGACG OsAMY3      | 66        | 205            | CGACG element" found in the GC-rich regions of the rice (O.s.) Amy3D and Amy3E amylase genes, but not in Amy3E gene; May function as a coupling element for the G box element | 10 <sup>-4</sup>  |
| G-box-like        | 41        | 136            | G-box sequences ; Required for high-level constitutive expression in seed, leaf, root, axillary bud, almost all parts of flower buds and pollen;                              | 10 <sup>-7</sup>  |
| GBOX RELOSAMY3    | 2         | 2              | G box-related element found in Amy3D (amylase) promoter of rice (O.s.); Similar to ABRE;                                                                                      | 10 <sup>-3</sup>  |
| GC rich repeat II | 18        | 25             | GC-rich repeat in the phosphoenolpyruvate carboxylase gene                                                                                                                    | 10 <sup>-4</sup>  |
| Motif A           | 12        | 12             | Found in Osem gene promoter. ACGTG containing motifs, similar to ABRE element                                                                                                 | 10 <sup>-6</sup>  |
| Motif B           | 12        | 14             | Found in Osem gene promoter. ACGTG containing motifs, similar to ABRE element                                                                                                 | 10 <sup>-7</sup>  |
| Motif I           | 10        | 10             | Found in promoter region of cereal storage proteins                                                                                                                           | 10 <sup>-4</sup>  |
